# Supplementary material
Source: Springer Nature journal article supplement (https://mijn.bsl.nl/resource/supplementary/13047_2011_349_MOESM3_ESM.pdf/7110634)
Supplement: MOESM3 [file 7110634]

# MANCHESTER FOOT PAIN AND DISABILITY INDEX – GREEK LANGUAGE VERSION

Παρακάτω υπάρχουν μερικές παρατηρήσεις για προβλήματα που παρουσιάζονται στους ανθρώπους λόγω **πόνου στα πόδια τους**.

Για κάθε παρατήρηση σημειώστε αν αυτο σας έχει συμβεί τον **περασμένο μήνα**. Αν ναι, συνέβει μόνο μερικές μέρες, τις περισσότερες ή κάθε μέρα του περασμένου μήνα;

Σας παρακαλώ να σημειώσται σε ένα κουτί για κάθε προτάση

|                                                                                            | Ποτέ                     | Μερικές μέρες            | Τις περισσότερες / Κάθε μέρα |                                     |
|--------------------------------------------------------------------------------------------|--------------------------|--------------------------|------------------------------|-------------------------------------|
| <b>Εξαιτίας του πόνου στα πόδια μου</b>                                                    |                          |                          |                              |                                     |
| Αποφεύγω να περπατώ έξω εντελώς                                                            | <input type="checkbox"/> | <input type="checkbox"/> | <input type="checkbox"/>     |                                     |
| Αποφεύγω να περπατώ μακρινές αποστάσεις                                                    | <input type="checkbox"/> | <input type="checkbox"/> | <input type="checkbox"/>     |                                     |
| Δεν περπατώ με κανονικό τρόπο                                                              | <input type="checkbox"/> | <input type="checkbox"/> | <input type="checkbox"/>     |                                     |
| Περπατώ σιγανά                                                                             | <input type="checkbox"/> | <input type="checkbox"/> | <input type="checkbox"/>     |                                     |
| Πρέπει να σταματήσω και να ξεκουράσω τα πόδια μου                                          | <input type="checkbox"/> | <input type="checkbox"/> | <input type="checkbox"/>     |                                     |
| Αποφεύγω να περπατώ σε σκληρές ή ανώμαλες επιφάνειες                                       | <input type="checkbox"/> | <input type="checkbox"/> | <input type="checkbox"/>     |                                     |
| <b>Εξαιτίας του πόνου στα πόδια μου</b>                                                    |                          |                          |                              |                                     |
| Αποφεύγω να στέκομαι για πολυ ώρα                                                          | <input type="checkbox"/> | <input type="checkbox"/> | <input type="checkbox"/>     |                                     |
| Παίρνω το λεωφορείο ή χρησιμοποιώ το αυτοκίνητο πιο συχνά                                  | <input type="checkbox"/> | <input type="checkbox"/> | <input type="checkbox"/>     |                                     |
| Χρειάζομαι βοήθεια με τις δουλειές του σπιτιού/με τα ψώνια                                 | <input type="checkbox"/> | <input type="checkbox"/> | <input type="checkbox"/>     |                                     |
| Ακόμα κάνω τα πάντα αλλά με περισσότερο πόνο ή ενοχλήσεις                                  | <input type="checkbox"/> | <input type="checkbox"/> | <input type="checkbox"/>     |                                     |
| Γίνομαι νευρικός όταν πονάνε τα πόδια μου                                                  | <input type="checkbox"/> | <input type="checkbox"/> | <input type="checkbox"/>     |                                     |
| Ντρέπομαι για τα πόδια μου                                                                 | <input type="checkbox"/> | <input type="checkbox"/> | <input type="checkbox"/>     |                                     |
| Ντρέπομαι για τα παπούτσια που πρέπει να φορώ.                                             | <input type="checkbox"/> | <input type="checkbox"/> | <input type="checkbox"/>     |                                     |
| Έχω συνέχεια πόνο στα πόδια μου                                                            | <input type="checkbox"/> | <input type="checkbox"/> | <input type="checkbox"/>     |                                     |
| Τα πόδια μου είναι χειρότερα το πρωί                                                       | <input type="checkbox"/> | <input type="checkbox"/> | <input type="checkbox"/>     |                                     |
| Τα πόδια μου πονούν περισσότερο το βράδυ                                                   | <input type="checkbox"/> | <input type="checkbox"/> | <input type="checkbox"/>     |                                     |
| Με σουβλίζουν τα πόδια μου                                                                 | <input type="checkbox"/> | <input type="checkbox"/> | <input type="checkbox"/>     |                                     |
| <b>Εξαιτίας του πόνου στα πόδια μου</b>                                                    |                          |                          |                              |                                     |
| Αδύνατο να τα βγάλω πέρα την προηγούμενη δουλειά μου                                       | <input type="checkbox"/> | <input type="checkbox"/> | <input type="checkbox"/>     | <input type="checkbox"/> Δεν ισχύει |
| Δεν κάνω πια τις προηγούμενες δραστηριότητές μου (αθλήματα, χορό, περπάτημα σε λόφους κτλ) | <input type="checkbox"/> | <input type="checkbox"/> | <input type="checkbox"/>     | <input type="checkbox"/>            |

Σημειώστε εδώ όταν έχετε διαβάσει όλες τις προτάσεις σε αυτή τη σελίδα
